# Supplementary material for: The prevention and management of chronic disease in primary care: recommendations from a knowledge translation meeting
Source: PubMed Central journal article supplement (PMC4608115; doi:10.1186/s13104-015-1514-0), 2015-10-15
Supplement: 13104_2015_1514_MOESM2_ESM.pdf [file 13104_2015_1514_MOESM2_ESM.pdf]

## Additional File 2: List of participants

| Nom                                         | Poste/Projet                                                                                                      | Organisation                             |
|---------------------------------------------|-------------------------------------------------------------------------------------------------------------------|------------------------------------------|
| <b>Région 01 - Bas St-Laurent</b>           |                                                                                                                   |                                          |
| Dominique Perron                            | Professionnel responsable - Dossier Maladies Chroniques                                                           | ASSS Bas St-Laurent                      |
| Marc St-Laurent                             | Directeur régional des ressources informationnelles, Évaluateur du Programme Pfizer-FRQS-MSSS Maladies Chroniques | ASSS Bas St-Laurent                      |
| <b>Région 02 – Saguenay-Lac St-Jean</b>     |                                                                                                                   |                                          |
| Dr Martin Bélanger                          | PR1MAC, chercheur principal                                                                                       | ASSS Saguenay-Lac-St-Jean                |
| Dr Tarek Bouhali                            | PR1MAC, coordonnateur                                                                                             | CSSS Chicoutimi/Université de Sherbrooke |
| Bayéro Diallo                               | PR1MAC                                                                                                            | CSSS Chicoutimi                          |
| Dr Martin Fortin                            | PR1MAC, chercheur principal                                                                                       | CSSS Chicoutimi/Université de Sherbrooke |
| Maud-Christine Chouinard                    | V1sages, chercheuse principale                                                                                    | CSSS Chicoutimi/UQAC                     |
| Dre Catherine Hudon                         | V1sages, chercheuse principale                                                                                    | CSSS Chicoutimi/Université de Sherbrooke |
| Martine Couture                             | Présidente Directrice Générale                                                                                    | ASSS Saguenay-Lac-St-Jean                |
| Dr Donald Aubin                             | Dir. Services de santé, affaires médicales, universitaires et hospitalières                                       | ASSS Saguenay-Lac-St-Jean                |
| Katia Tousignant                            | Professionnelle responsable - Dossier Maladies Chroniques                                                         | ASSS Saguenay-Lac-St-Jean                |
| <b>Région 03 – Capitale Nationale QC</b>    |                                                                                                                   |                                          |
| Hélène Bélanger                             | Professionnelle responsable - Dossier Maladies Chroniques                                                         | ASSS Capitale Nationale (QC)             |
| <b>Région 04 – Mauricie et Centre du QC</b> |                                                                                                                   |                                          |
| Gilles Hudon                                | Directeur des services de santé et des affaires médicales                                                         | ASSS Mauricie et Centre du QC            |

| <b>Nom</b>                  | <b>Poste/Projet</b>                                                                              | <b>Organisation</b>                                |
|-----------------------------|--------------------------------------------------------------------------------------------------|----------------------------------------------------|
| Josée Massicotte            | Professionnelle responsable - Dossier Maladies Chroniques                                        | ASSS Mauricie et Centre du QC                      |
| <b>Région 05 – Estrie</b>   |                                                                                                  |                                                    |
| Lynda Périgny               | Directrice des services, des affaires médicales et universitaires                                | ASSS Estrie                                        |
| Audrey-Anne Simard          | Professionnelle responsable - Dossier Maladies Chroniques                                        | ASSS Estrie                                        |
| <b>Région 06 – Montréal</b> |                                                                                                  |                                                    |
| Sara Ahmed                  | Chercheure principale (subventionnée)                                                            | MUHC - Hôpital Royal<br>Victoria/Université McGill |
| Tim Halal                   | Physiothérapeute                                                                                 | CSSS Cavendish                                     |
| Marie-Andrée Lahaie         | Psychologue                                                                                      | CSSS Ouest de l'Île/Cavendish                      |
| Susan Templeman             | Infirmière                                                                                       | CSSS Vaudreuil-Soulanges                           |
| Regina Visca                | Coordonnatrice                                                                                   | RUIS McGill                                        |
| Dr Mark Ware                | Chercheur principal (subventionné)                                                               | Hôpital Général de Montréal/Université McGill      |
| Dr André Bélanger           | Médecin conseil                                                                                  | ASSS Montréal                                      |
| Dre Johanne Desforges       | Chercheure principale (subventionnée)                                                            | CSSS Sud-Ouest-Verdun                              |
| Dominique Grimard           | Agente de planification, de programmation et de recherche Services préventifs en milieu clinique | Santé publique Montréal                            |
| Dr Pierre Larochelle        | Médecin conseil                                                                                  | ASSS Montréal                                      |
| Dre Sylvie Provost          | Médecin conseil                                                                                  | Santé publique Montréal                            |
| Dr Pierre Tousignant        | Chercheur principal (subventionné)                                                               | Université McGill                                  |
| Christiane Barbeau          | Coordonnatrice en Gestion de maladies chroniques                                                 | ASSS Montréal                                      |
| Dr Richard Bergeron         | Adjoint médical au directeur des services généraux et des maladies chroniques                    | ASSS Montréal                                      |
| Henriette Bilodeau          | Professeure - École des Sciences de la Gestion                                                   | UQAM                                               |

| <b>Nom</b>                                       | <b>Poste/Projet</b>                                                                           | <b>Organisation</b>                                      |
|--------------------------------------------------|-----------------------------------------------------------------------------------------------|----------------------------------------------------------|
| Gilles Dupuis                                    | Directeur scientifique du Centre de liaison sur l'intervention de la prévention psychosociale | CLIPP/UQAM                                               |
| Dr Rod Finlayson                                 | Directeur                                                                                     | RUIS McGill Centre d'Expertise pour la douleur chronique |
| Shandi Miller                                    | Coordonnatrice Réseau-1 Québec, Projets spéciaux, Centre de recherche                         | Centre hospitalier St-Mary                               |
| Dr Jacques Ricard                                | Directeur des services généraux et des maladies chroniques, Animateur                         | ASSS Montréal                                            |
| <b>Région 07 – Outaouais</b>                     |                                                                                               |                                                          |
| Marilyne Côté                                    | Chef de l'Administration des Programmes, Services Généraux de Santé                           | ASSS Outaouais                                           |
| Julie Larivière                                  | Professionnelle responsable - Dossier Maladies Chroniques                                     | ASSS Outaouais                                           |
| <b>Région 08 – Abitibi-Témiscamingue</b>         |                                                                                               |                                                          |
| Dr Éric Lampron-Goulet                           | Adjoint médical au directeur de santé publique                                                | Direction Santé Publique Abitibi-Témiscamingue           |
| <b>Région 10 – Baie-James</b>                    |                                                                                               |                                                          |
| Vincent Rajotte                                  | Professionnel responsable - Dossier Maladies Chroniques                                       | ASSS Baie-James                                          |
| <b>Région 11 – Gaspésie-Îles de la Madeleine</b> |                                                                                               |                                                          |
| Josée Gauthier                                   | Chercheure principale (subventionnée)                                                         | INSPQ/UQAR                                               |
| Tim Sutton                                       | Kinésiologue                                                                                  | CSSS du Rocher-Percé                                     |
| Stella Travers                                   | Chercheure principale (subventionnée)                                                         | CSSS du Rocher-Percé                                     |
| Dre Yolaine Galarneau                            | Présidente Directrice Générale, Animatrice                                                    | ASSS Gaspésie-Îles de la Madeleine                       |
| <b>Région 12 – Chaudière-Appalaches</b>          |                                                                                               |                                                          |

| Nom                            | Poste/Projet                                                                                                           | Organisation                                              |
|--------------------------------|------------------------------------------------------------------------------------------------------------------------|-----------------------------------------------------------|
| France Tanguay                 | Professionnelle responsable - Dossier Maladies Chroniques                                                              | ASSS Chaudière-Appalaches                                 |
| <b>Région 13 – Laval</b>       |                                                                                                                        |                                                           |
| Céline Bareil                  | TRANSIT co-chercheure                                                                                                  | HEC Montréal                                              |
| Dre Eveline Hudon              | TRANSIT co-chercheure                                                                                                  | Université de Montréal                                    |
| Lyne Lalonde                   | TRANSIT chercheure principale                                                                                          | CSSS Laval/Université de Montréal                         |
| Lise Lévesque                  | TRANSIT coordonnatrice                                                                                                 | CSSS Laval                                                |
| Dre Marie-Thérèse Lussier      | TRANSIT co-chercheure                                                                                                  | CSSS Laval/Université de Montréal                         |
| Dr Alain Turcotte              | TRANSIT chercheur principal                                                                                            | CSSS Laval                                                |
| Maria Mata                     | Professionnelle responsable - Dossier Maladies Chroniques                                                              | ASSS Laval                                                |
| <b>Région 14 - Lanaudière</b>  |                                                                                                                        |                                                           |
| Maryse Tremblay                | Professionnelle responsable - Dossier Maladies Chroniques                                                              | ASSS Lanaudière                                           |
| <b>Région 15 - Laurentides</b> |                                                                                                                        |                                                           |
| Rolande Daignault              | Consultante                                                                                                            | ASSS Laurentides                                          |
| <b>Région 16 - Montérégie</b>  |                                                                                                                        |                                                           |
| Dre Monia Ghorbel              | Résidente 3 santé publique et médecine préventive, stagiaire à la direction de santé publique de la Montérégie (SIID2) | Université de Sherbrooke/ CSSS Champlain Charles-Le-Moyne |
| Dre Maryse Guay                | SIID2 chercheure principale                                                                                            | Université de Sherbrooke/ASSS Montérégie                  |
| Lise Jetté                     | SIID2 Infirmière clinicienne                                                                                           | CSSS Champlain Charles-Le-Moyne                           |
| Linda Lanthier                 | SIID2 Nutritionniste                                                                                                   | CSSS Champlain Charles-Le-Moyne                           |
| Sarah Dutilly-Simard           | Agente de planification, de programmation et de recherche<br>Secteur planification, évaluation et recherche            | Direction de Santé Publique,<br>Montérégie                |

| <b>Nom</b>           | <b>Poste/Projet</b>                                                                                                                                        | <b>Organisation</b> |
|----------------------|------------------------------------------------------------------------------------------------------------------------------------------------------------|---------------------|
| Dre Sylvie Tardif    | Directrice des affaires médicales, universitaires et des partenariats                                                                                      | ASSS Montérégie     |
| Liliane Thystere     | Professionnelle responsable - Dossier Maladies Chroniques                                                                                                  | ASSS Montérégie     |
| <b>Pfizer Canada</b> |                                                                                                                                                            |                     |
| Farzad Ali           | Directeur « outcomes research »                                                                                                                            | Pfizer Canada       |
| Ashley Coughlin      | Directeur de marque                                                                                                                                        | Pfizer Canada       |
| Denise Cloutier      | Directrice, stratégies et politiques de la santé au sein de la division des affaires publiques et des relations                                            | Pfizer Canada       |
| Sophie Rochon        | Chef, Remboursement et politiques de la santé – QC                                                                                                         | Pfizer Canada       |
| Patrice Roy          | Directeur, Recherche et développement, Québec et Atlantique                                                                                                | Pfizer Canada       |
| <b>FRQS</b>          |                                                                                                                                                            |                     |
| Dr Renaldo Battista  | Directeur Scientifique                                                                                                                                     | FRQS                |
| Anne-Cécile Desfaits | Directrice des programmes (intérim) et des partenariats                                                                                                    | FRQS                |
| Karine Genest        | Chargée de programmes                                                                                                                                      | FRQS                |
| Manon Pelletier      | Chargée de programmes- Maladies Chroniques                                                                                                                 | FRQS                |
| <b>MSSS</b>          |                                                                                                                                                            |                     |
| François Dubé        | Directeur adjoint de l'organisation des services de 1 <sup>ère</sup> ligne intégrés                                                                        | MSSS                |
| Francis Dubois       | Conseiller en orientation et coordination de la recherche et de l'innovation – Direction de la recherche, de l'innovation et du transfert de connaissances | MSSS                |
| Rana Farah           | Professionnelle responsable - Dossier Maladies Chroniques                                                                                                  | MSSS                |
| Dr Antoine Groulx    | Directeur de l'organisation des services de 1 <sup>ère</sup> ligne intégrés                                                                                | MSSS                |
| Geneviève Landry     | Coordonnatrice en développement et gestion de projets - Direction de l'organisation des services de 1 <sup>ère</sup> ligne intégrés                        | MSSS                |

**Nom**

Jacques Rhéaume

**Poste/Projet**

Conseiller en orientation et coordination de la recherche et de l'innovation – Direction de la recherche, de l'innovation et du transfert de connaissances

**Organisation**

MSSS
